# Supplementary material
Source: Elsevier journal article supplement (https://www.sciencedirect.com/science/article/pii/S0025775321001342)
Supplement: mmc2 [file S0025775321001342:mmc2.doc]

| **Material suplementario Tabla 1S** |  | |  | |  |  | | |
| --- | --- | --- | --- | --- | --- | --- | --- | --- |
| **Valores basales de todas las variables incluidas en el estudio** | | | |  | | | | |
|  | | **GRUPO A** | | **GRUPO B** | | | **GRUPO C** | **p-valor** |
| **x2 /KW** |
| **N** | | **578** | | **299** | | | **531** |  |
| Edad *media (DS)* | | 81,1 (6,5) | | 81,0 (6,6) | | | 82,1 (6,4) | 0,062 |
| Sexo masculino *N (%)* | | 320 (55%) | | 117 (39%) | | | 222 (42%) | <0,001 |
| IMC *media (DS)* | | 29,3 (5,9) | | 29,3 (5,5) | | | 29,8 (18,0) | 0,516 |
| Hábito Tabáquico *N (%)* | | 217 (38%) | | 101 (34%) | | | 165 (31%) | 0,075 |
| Alcohol *N (%)* | | 87 (15%) | | 25 (8,4%) | | | 59 (11%) | 0,01 |
| Hipertensión Arterial *N (%)* | | 520 (90%) | | 263 (88%) | | | 478 (90%) | 0,595 |
| Diabetes Mellitus *N (%)* | | 261 (45%) | | 172 (58%) | | | 301 (57%) | <0,001 |
| Dislipemia *N (%)* | | 302 (52%) | | 177 (59%) | | | 315 (59%) | 0,033 |
| IAM previo *N (%)* | | 163 (28%) | | 90 (30%) | | | 153 (29%) | 0,841 |
| Valvulopatía *N (%)* | | 246 (43%) | | 146 (49%) | | | 257 (48%) | 0,085 |
| Insuficiencia Cardiaca Crónica Previa *N (%)* | | 528 (91%) | | 274 (92%) | | | 493 (93%) | 0,639 |
| Insuficiencia Renal Crónica *N (%)* | | 345 (60%) | | 207 (69%) | | | 411 (77%) | <0,001 |
| Arteriopatía Periférica *N (%)* | | 56 (9,7%) | | 32 (11%) | | | 71 (13%) | 0,144 |
| Enfermedad Cerebrovascular *N (%)* | | 85 (15%) | | 57 (19%) | | | 77 (15%) | 0,168 |
| Demencia *N (%)* | | 21 (3,6%) | | 19 (6,4%) | | | 23 (4,3%) | 0,178 |
| EPOC *N (%)* | | 157 (27%) | | 64 (21%) | | | 121 (23%) | 0,1 |
| FA *N (%)* | | 419 (72%) | | 215 (72%) | | | 360 (68%) | 0,197 |
| Frecuencia Cardiaca *media (DS)* | | 86,0 (22,3) | | 81,8 (19,3) | | | 80,3 (18,7) | <0,001 |
| Presión arterial sistólica *media (DS)* | | 135,5 (24,9) | | 133,9 (24,8) | | | 135,0 (24,5) | 0,538 |
| Índice de Charlson *media (DS)* | | 2,9 (2,3) | | 3,7 (2,5) | | | 3,9 (2,6) | <0,001 |
| Índice de Barthel *media (DS)* | | 84,0 (20,6) | | 80,5 (22,2) | | | 78,3 (23,6) | <0,001 |
| Clase NYHA *N (%)* | |  | |  | | |  |  |
| I | | 29 (5,1%) | | 10 (3,4%) | | | 11 (2,1%) | 0,028 |
| II | | 332 (58%) | | 176 (59%) | | | 293 (56%) | 0,568 |
| III | | 196 (34%) | | 106 (36%) | | | 214 (41%) | 0,081 |
| IV | | 15 (2,6%) | | 6 (2,0%) | | | 9 (1,7%) | 0,57 |
| Pfeiffer *media (DS)* | | 1,5 (1,8) | | 1,5 (1,8) | | | 1,7 (2,0) | 0,061 |
| FEVI (%)*media (DS)* | | 50,8 (15,2) | | 52,8 (13,8) | | | 54,3 (14,2) | 0,001 |
| FEVI reducida (<40%) *N (%)* | | 128 (22%) | | 52 (17%) | | | 83 (16%) | 0,017 |
| FEVI intermedia (40-50%) *N (%)* | | 100 (17%) | | 42 (14%) | | | 66 (12%) | 0,068 |
| FEVI preservada (>50%) *N (%)* | | 350 (61%) | | 205 (69%) | | | 382 (72%) | <0,001 |
| **Analítica** *media (DS)* | |  | |  | | |  |  |
| Hemoglobina | | 13,4 (1,0) | | 10,7 (1,0) | | | 10,2 (1,2) | <0,001 |
| Sodio | | 138,9 (4,8) | | 138,8 (4,7) | | | 138,4 (5,0) | 0,277 |
| Filtrado glomerular (1) | | 55,7 (19,9) | | 50,7 (22,3) | | | 44,8 (20,4) | <0,001 |
| Potasio | | 4,3 (0,6) | | 4,3 (0,6) | | | 4,4 (0,6) | <0,001 |
| ferritina | | 154 (148) | | 131 (156) | | | 179 (277) | 0,042 |
| Saturación de la transferrina | | 17,2 (9,7) | | 11,4 (6,2) | | | 13,0 (10,5) | <0,001 |
| **Tratamientos seguimiento** *N (%)* | |  | |  | | |  |  |
| Antiagregantes | | 170 (29%) | | 104 (35%) | | | 194 (37%) | 0,034 |
| IECA /ARA II / ARNI | | 378 (65%) | | 169 (57%) | | | 328 (62%) | 0,036 |
| Betabloqueantes | | 384 (66%) | | 204 (68%) | | | 331 (62%) | 0,172 |
| Diuréticos distales (2) | | 204 (35%) | | 119 (40%) | | | 153 (29%) | 0,004 |
| Diuréticos proximales (3) | | 498 (86%) | | 273 (91%) | | | 473 (89%) | 0,064 |
| Antagonistas Ca | | 92 (16%) | | 58 (19%) | | | 115 (22%) | 0,049 |
| Ivravadina | | 16 (2,8%) | | 10 (3,3%) | | | 10 (1,9%) | 0,403 |
| Digoxina | | 116 (20%) | | 61 (20%) | | | 86 (16%) | 0,176 |
| Anticoagulación | | 345 (60%) | | 167 (56%) | | | 279 (53%) | 0,056 |
| Fe oral | | 48 (8,3%) | | 78 (26%) | | | 141 (27%) | <0,001 |
| Incluido en UMIPIC (4) | | 347 (60%) | | 196 (66%) | | | 301 (57%) | 0,044 |
| (1): Según fórmula CKD-EPI (2): Espironolactona, eplerenona, triamterene, amilorida (3): Furosemida, bumetanida, torasemida | | | | | | | | | |
| (4): Unidades de Medicina Interna especializadas en el manejo y control de pacientes con insuficiencia cardiaca. | | | | | | | | | |
| *DS:* desviación estándar; IMC: índice de masa corporal; IAM: infarto agudo de miocardio; ICC: insuficiencia cardiaca crónica; EPOC: enfermedad pulmonar obstructiva crónica; FA: fibrilación auricular; NYHA: New York Heart Association; FEVI: fracción de eyección ventricular izquierda; | | | | | | | | | |
| IECA: Inhibidores enzima conversora angiotensina; ARA: antagonistas receptores angiotensina; ARNI: antagonistas receptores neprilesina; Fe: hierro. | | | | | | | | | |
