# Supplementary material
Source: Elsevier journal article supplement (https://www.sciencedirect.com/science/article/pii/S0025775321001342)
Supplement: mmc3 [file S0025775321001342:mmc3.doc]

| **Material suplementario Tabla 2S** |  | |  |  | |  | |
| --- | --- | --- | --- | --- | --- | --- | --- |
| **REGRESIÓN de Cox para muerte o reingreso por cualquier causa.** | | | |  | |  | |
|  | **Univariante** | | | **Multivariante** | | | |
| **Variables** | **HR (IC95%)** | **p-valor** | | **HR (IC95%)** | **p-valor** | | |
| **Evolución Hemoglobina** |  | <0,001 | |  | 0.005 | | |
| Grupo A (ref.) | 1 (ref.) | - | | 1 (ref.) | - | | |
| Grupo B | 0.86 (0.70-1.06) | 0.162 | | 0.81 (0.66-1.01) | 0.063 | | |
| Grupo C | 1.33 (1.13-1.55) | 0.001 | | 1.15 (0.97-1.37) | 0.113 | | |
| GRUPO FEVI |  | 0.679 | |  |  | | |
| Reducida | 1.08 (0.89-1.31) | 0.422 | |  |  | | |
| Intermedia | 0.99 (0.82-1.18) | 0.883 | |  |  | | |
| Preservada (ref.) | 1 (ref.) | - | |  |  | | |
| Edad | 1.01 (1.00-1.02) | 0.219 | |  |  | | |
| Sexo | 1.18 (1.03-1.37) | 0.022 | | 1.22 (1.04-1.43) | 0.016 | | |
| Presión arterial sistólica | 1.00 (0.99-1.00) | 0.015 | | 1.00 (0.99-1.00) | 0.010 | | |
| Frecuencia Cardiaca | 1.00 (0.99-1.00) | 0.034 | | 1.00 (0.99-1.00) | 0.017 | | |
| IMC | 1.00 (0.99-1.00) | 0.376 | |  |  | | |
| Hábito Tabáquico | 1.10 (0.95-1.28) | 0.203 | |  |  | | |
| Alcohol | 0.95 (0.76-1.18) | 0.621 | |  |  | | |
| Hipertensión Arterial | 1.05 (0.83-1.34) | 0.682 | |  |  | | |
| Diabetes Mellitus | 1.01 (0.88-1.17) | 0.852 | |  |  | | |
| Dislipemia | 1.03 (0.89-1.19) | 0.723 | |  |  | | |
| IAM previo | 1.21 (1.04-1.41) | 0.016 | |  |  | | |
| Valvulopatía | 1.17 (1.01-1.35) | 0.036 | | 1.18 (1.01-1.38) | 0.032 | | |
| Insuficiencia Cardiaca Crónica Previa | 1.49 (1.11-2.00) | 0.008 | |  |  | | |
| Insuficiencia Renal Crónica | 1.32 (1.12-1.54) | <0,001 | |  |  | | |
| Arteriopatía Periférica | 1.18 (0.96-1.47) | 0.121 | |  |  | | |
| Enfermedad Cerebrovascular | 0.92 (0.75-1.12) | 0.395 | |  |  | | |
| Demencia | 0.98 (0.71-1.36) | 0.901 | |  |  | | |
| EPOC | 1.11 (0.95-1.31) | 0.195 | |  |  | | |
| FA | 0.99 (0.85-1.16) | 0.920 | |  |  | | |
| Índice de Charlson | 1.07 (1.04-1.10) | <0,001 | | 1.05 (1.02-1.08) | 0.001 | | |
| Barthel | 0.99 (0.99-1.00) | <0,001 | | 0.99 (0.99-1.00) | <0,001 | | |
| Clase NYHA |  | 0.003 | |  |  | | |
| I (ref.) | 1 (ref.) | - | |  |  | | |
| II | 1.17 (0.78-1.77) | 0.449 | |  |  | | |
| III | 1.51 (1.00-2.29) | 0.051 | |  |  | | |
| IV | 0.93 (0.46-1.86) | 0.831 | |  |  | | |
| Pfeiffer | 1.07 (1.03-1.11) | <0,001 | |  |  | | |
| **Analítica** |  |  | |  |  | | |
| Hemoglobina | 0.95 (0.91-0.98) | 0.005 | |  |  | | |
| Creatinina | 1.15 (1.07-1.23) | <0,001 | |  |  | | |
| Sodio | 0.99 (0.98-1.00) | 0.168 | |  |  | | |
| Filtrado glomerular(1) | 0.99 (0.99-1.00) | <0,001 | | 0.99 (0.99-1.00) | 0.001 | | |
| Potasio | 1.04 (0.92-1.17) | 0.560 | |  |  | | |
| Ferritina | 1.00 (1.00-1.00) | 0.323 | |  |  | | |
| Saturación de la transferrina | 0.99 (0.97-1.02) | 0.461 | |  |  | | |
| **Tratamientos seguimiento** |  |  | |  |  | | |
| Antiagregantes | 1.08 (0.93-1.26) | 0.297 | |  |  | | |
| IECA /ARA II / ARNI | 1.01 (0.87-1.17) | 0.882 | |  |  | | |
| Betabloqueantes | 0.93 (0.80-1.08) | 0.346 | |  |  | | |
| Diureticos distales (2) | 1.05 (0.90-1.22) | 0.551 | |  |  | | |
| Diuréticos proximales (3) | 1.17 (0.93-1.48) | 0.180 | |  |  | | |
| Antagonistas Ca | 0.93 (0.77-1.12) | 0.455 | |  |  | | |
| Ivravadina | 1.43 (0.92-2.20) | 0.108 | |  |  | | |
| Digoxina | 0.99 (0.82-1.19) | 0.898 | |  |  | | |
| ACOs | 1.01 (0.87-1.16) | 0.917 | |  |  | | |
| Fe oral | 0.91 (0.76-1.10) | 0.322 | |  |  | | |
| Fe IV | 0.66 (0.17-2.66) | 0.564 | |  |  | | |
| Incluido en UMIPIC (4) | 0.66 (0.57-0.76) | <0,001 | | 0.60 (0.51-0.70) | <0,001 | | |
| Los modelos multivariantes se estiman por pasos que tengan en el univariante un p-valor <0.10 | | | | | | | |
| (1) Según fórmula CKD-EPI  (2) Espironolactona, eplerenona, triamterene, amiloride  (3)  Furosemida, bumetanida, torasemida  (4) Unidades de Medicina Interna especializadas en el manejo y control de pacientes con insuficiencia cardiaca. | | | | |  | | |
|  | | |
|  | | |
|  | | |
| *DS:* desviación estándar; IMC: índice de masa corporal; IAM: infarto agudo de miocardio; ICC: insuficiencia cardiaca crónica; EPOC: enfermedad pulmonar obstructiva crónica; FA: fibrilación auricular; NYHA: New York Heart Association; FEVI: fracción de eyección ventricular izquierda; | | | | | | |
| IECA: Inhibidores enzima conversora angiotensina; ARA: antagonistas receptores angiotensina; ARNI: antagonistas receptores neprilesina; ACOs: anticoagulantes orales; Fe: hierro. | | | | | | |
