# Supplementary material
Source: Elsevier journal article supplement (https://www.sciencedirect.com/science/article/pii/S0025775321001342)
Supplement: mmc4 [file S0025775321001342:mmc4.doc]

| **Material suplementario Tabla 3S** | | |  | | |  | | |  | |  | |  | | |  | |  |  |
| --- | --- | --- | --- | --- | --- | --- | --- | --- | --- | --- | --- | --- | --- | --- | --- | --- | --- | --- | --- |
| **REGRESIÓN de Cox para muerte y reingreso por insuficiencia cardiaca** | | | | | | | | | | |  | |  | | |  | |  |  |
|  | | **Muerte por IC** | | | | | | | | | **Reingreso por IC** | | | | | | | |
|  | | **Univariante** | | | **Multivariante** | | | | | | **Univariante** | | | | **Multivariante** | | | |
| **Variables** | | **RR (IC95%)** | | **p-valor** | **RR (IC95%)** | | | **p-valor** | | | **RR (IC95%)** | | | **p-valor** | **RR (IC95%)** | | **p-valor** | |
| **Evolución Hemoglobina** | |  | | <0,001 |  | | | 0.003 | | |  | | | <0,001 |  | | 0.007 | |
| Grupo A (ref.) | | 1 (ref.) | | - | 1 (ref.) | | | - | | | 1 (ref.) | | | - | 1 (ref.) | | - | |
| Grupo B | | 0.99 (0.49-2.00) | | 0.984 | 0.71 (0.34-1.50) | | | 0.368 | | | 0.90 (0.68-1.90) | | | 0.454 | 0.87 (0.65-1.15) | | 0.316 | |
| Grupo C | | 2.40 (1.46-3.94) | | 0.001 | 1.92 (1.16-3.19) | | | 0.012 | | | 1.48 (1.20-1.83) | | | <0,001 | 1.29 (1.04-1.61) | | 0.024 | |
| GRUPO FEVI | |  | | 0.145 |  | | |  | | |  | | | 0.009 |  | |  | |
| Reducida | | 1.18 (0.69-2.02) | | 0.536 |  | | |  | | | 1.40 (1.11-1.78) | | | 0.005 |  | |  | |
| Intermedia | | 0.58 (0.31-1.09) | | 0.091 |  | | |  | | | 0.94 (0.74-1.21) | | | 0.638 |  | |  | |
| Preservada (ref.) | | 1 (ref.) | | - |  | | |  | | | 1 (ref.) | | | - |  | |  | |
| Edad | | 1.02 (0.98-1.05) | | 0.300 |  | | |  | | | 1.00 (0.99-1.02) | | | 0.597 |  | |  | |
| Sexo | | 1.30 (0.84-1.99) | | 0.237 |  | | |  | | | 0.95 (0.78-1.15) | | | 0.601 |  | |  | |
| Presión arterial sistólica | | 1.00 (0.99-1.01) | | 0.776 |  | | |  | | | 1.00 (0.99-1.00) | | | 0.093 |  | |  | |
| Frecuencia Cardiaca | | 1.00 (0.98-1.01) | | 0.370 |  | | |  | | | 1.00 (0.99-1.00) | | | 0.200 |  | |  | |
| IMC | | 0.93 (0.89-0.97) | | <0,001 |  | | |  | | | 0.99 (0.98-1.01) | | | 0.224 |  | |  | |
| Hábito Tabáquico | | 1.33 (0.85-2.07) | | 0.208 |  | | |  | | | 0.94 (0.77-1.16) | | | 0.583 |  | |  | |
| Alcohol | | 1.31 (0.74-2.32) | | 0.361 |  | | |  | | | 0.64 (0.46-0.90) | | | 0.010 |  | |  | |
| Hipertensión Arterial | | 0.62 (0.34-1.15) | | 0.129 |  | | |  | | | 1.21 (0.86-1.70) | | | 0.284 |  | |  | |
| Diabetes Mellitus | | 0.75 (0.49-1.15) | | 0.186 |  | | |  | | | 1.11 (0.91-1.34) | | | 0.307 |  | |  | |
| Dislipemia | | 0.70 (0.46-1.08) | | 0.108 |  | | |  | | | 1.23 (1.01-1.49) | | | 0.042 | 1.23 (1.01-1.51) | | 0.038 | |
| IAM previo | | 1.21 (0.76-1.91) | | 0.418 |  | | |  | | | 1.25 (1.02-1.53) | | | 0.035 |  | |  | |
| Valvulopatía | | 2.07 (1.33-3.21) | | 0.001 | 2.20 (1.39-3.47) | | | <0,001 | | | 1.31 (1.08-1.59) | | | 0.006 | 1.36 (1.12-1.66) | | 0.002 | |
| Insuficiencia Cardiaca Crónica Previa | | 1.17 (0.51-2.68) | | 0.712 |  | | |  | | | 1.70 (1.10-2.61) | | | 0.016 |  | |  | |
| Insuficiencia Renal Crónica | | 1.48 (0.91-2.41) | | 0.114 |  | | |  | | | 1.37 (1.10-1.70) | | | 0.005 |  | |  | |
| Arteriopatía Periférica | | 1.98 (1.15-3.41) | | 0.014 | 1.92 (1.09-3.40) | | | 0.024 | | | 0.96 (0.70-1.31) | | | 0.796 |  | |  | |
| Enfermedad Cerebrovascular | | 0.92 (0.50-1.70) | | 0.794 |  | | |  | | | 1.00 (0.76-1.30) | | | 0.975 |  | |  | |
| Demencia | | 1.88 (0.87-4.07) | | 0.111 |  | | |  | | | 0.80 (0.48-1.32) | | | 0.379 |  | |  | |
| EPOC | | 1.18 (0.73-1.91) | | 0.492 |  | | |  | | | 1.03 (0.82-1.28) | | | 0.823 |  | |  | |
| FA | | 0.89 (0.56-1.43) | | 0.638 |  | | |  | | | 1.12 (0.91-1.40) | | | 0.287 |  | |  | |
| Índice de Charlson | | 1.07 (0.99-1.16) | | 0.096 |  | | |  | | | 1.05 (1.01-1.08) | | | 0.017 |  | |  | |
| Barthel | | 0.99 (0.98-1.00) | | 0.033 |  | | |  | | | 1.00 (0.99-1.00) | | | 0.189 |  | |  | |
| Clase NYHA | |  | | 0.058 |  | | |  | | |  | | | 0.001 |  | | 0.002 | |
| I (ref.) | | 1 (ref.) | | - |  | | |  | | | 1 (ref.) | | | - | 1 (ref.) | | - | |
| II | | 2.88 (0.40-21.03) | | 0.296 |  | | |  | | | 1.50 (0.79-2.82) | | | 0.214 | 1.66 (0.88-3.15) | | 0.118 | |
| III | | 4.82 (0.66-35.01) | | 0.120 |  | | |  | | | 2.04 (1.08-3.86) | | | 0.028 | 2.23 (1.17-4.24) | | 0.0174 | |
| IV | | 1.99 (0.12-31.86) | | 0.627 |  | | |  | | | 0.67 (0.21-2.14) | | | 0.502 | 0.89 (0.28-2.87) | | 0.851 | |
| Pfeiffer | | 1.25 (1.15-1.37) | | <0,001 | 1.23 (1.12-1.34) | | | <0,001 | | | 1.09 (1.03-1.14) | | | <0,001 |  | |  | |
| **Analítica** | |  | |  |  | | |  | | |  | | |  |  | |  | |
| Hemoglobina | | 0.85 (0.76-0.96) | | 0.006 |  | | |  | | | 0.93 (0.88-0.98) | | | 0.005 |  | |  | |
| Creatinina | | 1.23 (1.00-1.50) | | 0.045 |  | | |  | | | 1.10 (1.00-1.22) | | | 0.061 |  | |  | |
| Sodio | | 1.00 (0.96-1.04) | | 0.972 |  | | |  | | | 0.99 (0.97-1.01) | | | 0.232 |  | |  | |
| Filtrado glomerular(1) | | 0.99 (0.98-1.00) | | 0.028 |  | | |  | | | 0.99 (0.99-1.00) | | | <0,001 | 0.99 (0.99-1.00) | | <0,001 | |
| Potasio | | 0.85 (0.58-1.23) | | 0.390 |  | | |  | | | 1.04 (0.88-1.21) | | | 0.669 |  | |  | |
| Ferritina | | 1.00 (1.00-1.00) | | 0.914 |  | | |  | | | 1.00 (1.00-1.00) | | | 0.393 |  | |  | |
| Saturación de la transferrina | | 0.99 (0.89-1.09) | | 0.810 |  | | |  | | | 0.99 (0.95-1.02) | | | 0.437 |  | |  | |
| **Tratamientos seguimiento** | |  | |  |  | | |  | | |  | | |  |  | |  | |
| Antiagregantes | | 1.20 (0.77-1.88) | | 0.412 |  | | |  | | | 1.13 (0.92-1.38) | | | 0.251 |  | |  | |
| IECA /ARA II / ARNI | | 0.64 (0.41-0.99) | | 0.046 |  | | |  | | | 1.28 (1.04-1.58) | | | 0.020 | 1.33 (1.07-1.64) | | 0.009 | |
| Betabloqueantes | | 1.03 (0.66-1.61) | | 0.897 |  | | |  | | | 0.92 (0.76-1.13) | | | 0.434 |  | |  | |
| Diureticos distales (2) | | 1.06 (0.68-1.66) | | 0.793 |  | | |  | | | 0.94 (0.77-1.16) | | | 0.586 |  | |  | |
| Diuréticos proximales (3) | | 1.59 (0.73-3.45) | | 0.240 |  | | |  | | | 1.18 (0.86-1.62) | | | 0.297 |  | |  | |
| Antagonistas Ca | | 0.93 (0.54-1.60) | | 0.783 |  | | |  | | | 1.00 (0.79-1.28) | | | 0.976 |  | |  | |
| Digoxina | | 1.78 (1.12-2.83) | | 0.015 |  | | |  | | | 1.02 (0.80-1.31) | | | 0.870 |  | |  | |
| ACOs | | 0.92 (0.60-1.42) | | 0.710 |  | | |  | | | 1.15 (0.95-1.40) | | | 0.153 |  | |  | |
| Fe oral | | 1.26 (0.76-2.10) | | 0.374 |  | | |  | | | 0.85 (0.66-1.10) | | | 0.213 |  | |  | |
| Fe IV | | - | | - |  | | |  | | | 1.33 (0.33-5.33) | | | 0.689 |  | |  | |
| Incluido en UMIPIC (4) | | 0.65 (0.42-0.99) | | 0.046 |  | | |  | | | 0.44 (0.36-0.53) | | | <0,001 | 0.41 (0.33-0.49) | | <0,001 | |
| Los modelos multivariantes se estiman por pasos que tengan en el univariante un p-valor <0.10 | | | | | | | | | | | | | | | | | | |
| (1) Según fórmula CKD-EPI | | |  | | |  | | |  |  |  | | |  |  | |  | |
| (2) Espironolactona, eplerenona, triamterene, amiloride | | | | | |  | | |  |  |  | | |  |  | |  | |
| (3)  Furosemida, bumetanida, torasemida | | | | | |  | | |  |  |  | | |  |  | |  | |
| (4) Unidades de Medicina Interna especializadas en el manejo y control de pacientes con insuficiencia cardiaca. | | | | | | |  | | | |  | | |  |  | |  | |
| *DS:* desviación estándar; IMC: índice de masa corporal; IAM: infarto agudo de miocardio; ICC: insuficiencia cardiaca crónica; EPOC: enfermedad pulmonar obstructiva crónica; FA: fibrilación auricular; NYHA: New York Heart Association; FEVI: fracción de eyección ventricular izquierda; | | | | | | | | | | |
| IECA: Inhibidores enzima conversora angiotensina; ARA: antagonistas receptores angiotensina; ARNI: antagonistas receptores neprilesina; ACOs: anticoagulantes orales; Fe: hierro. | | | | | | | | | | |
